# Supplementary material for: Population exposure to droughts in China under the 1.5 °C global warming target
Source: Copernicus journal article supplement (doi:10.5194/esd-9-1097-2018), 2018-08-29
Supplement: Supplementary file 1 [file esd-9-1097-2018-supplement.pdf]

Supplement of Earth Syst. Dynam., 9, 1097–1106, 2018  
<https://doi.org/10.5194/esd-9-1097-2018-supplement>  
© Author(s) 2018. This work is distributed under  
the Creative Commons Attribution 4.0 License.

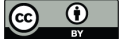

*Supplement of*

## **Population exposure to droughts in China under the 1.5 °C global warming target**

**Jie Chen et al.**

*Correspondence to:* Yujie Liu ([liuyujie@igsnr.ac.cn](mailto:liuyujie@igsnr.ac.cn)) and Tao Pan ([pantao@igsnr.ac.cn](mailto:pantao@igsnr.ac.cn))

The copyright of individual parts of the supplement might differ from the CC BY 4.0 License.

## Supplement

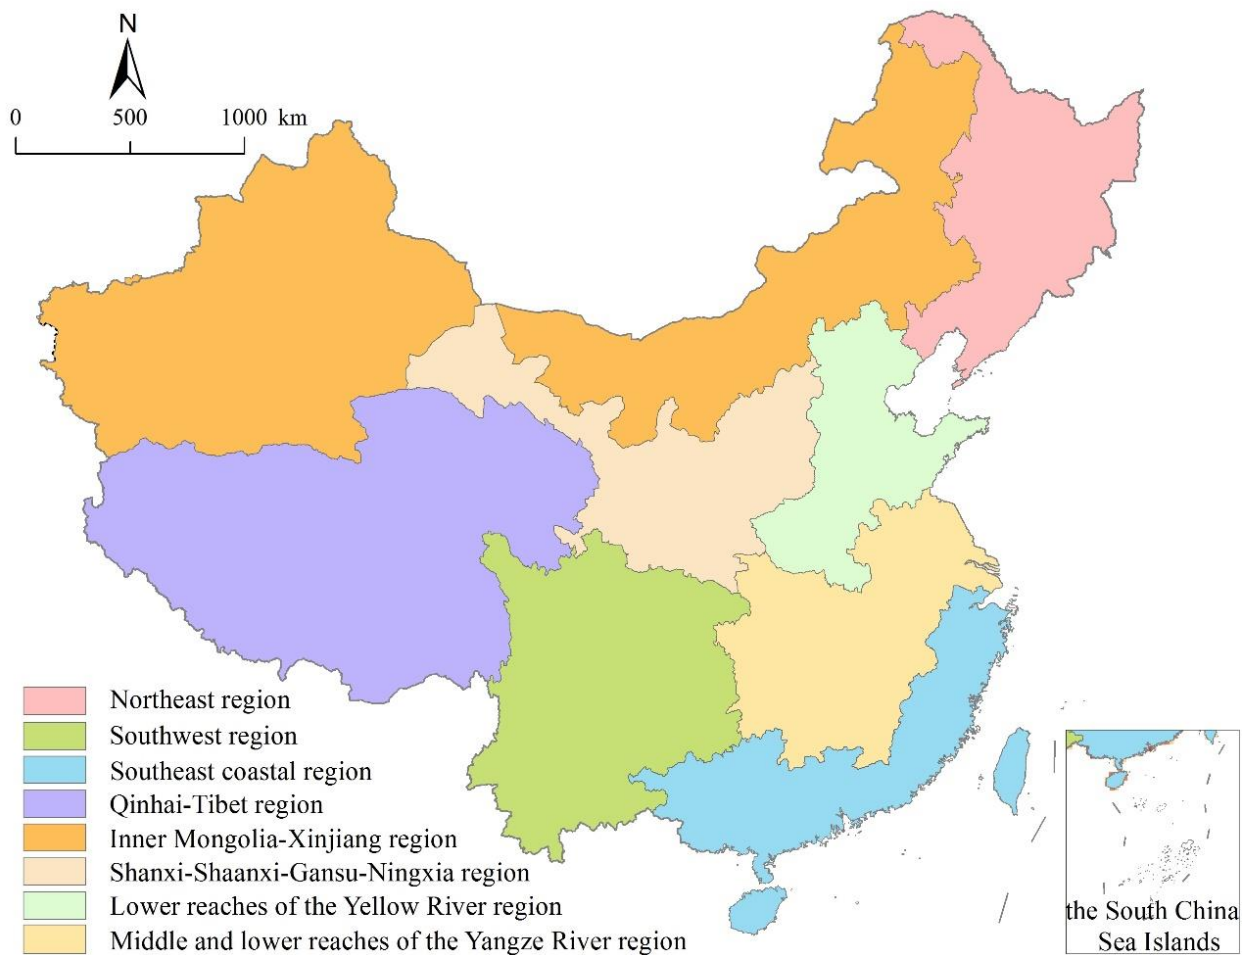

**Fig. S1 Regional divisions of China's population**

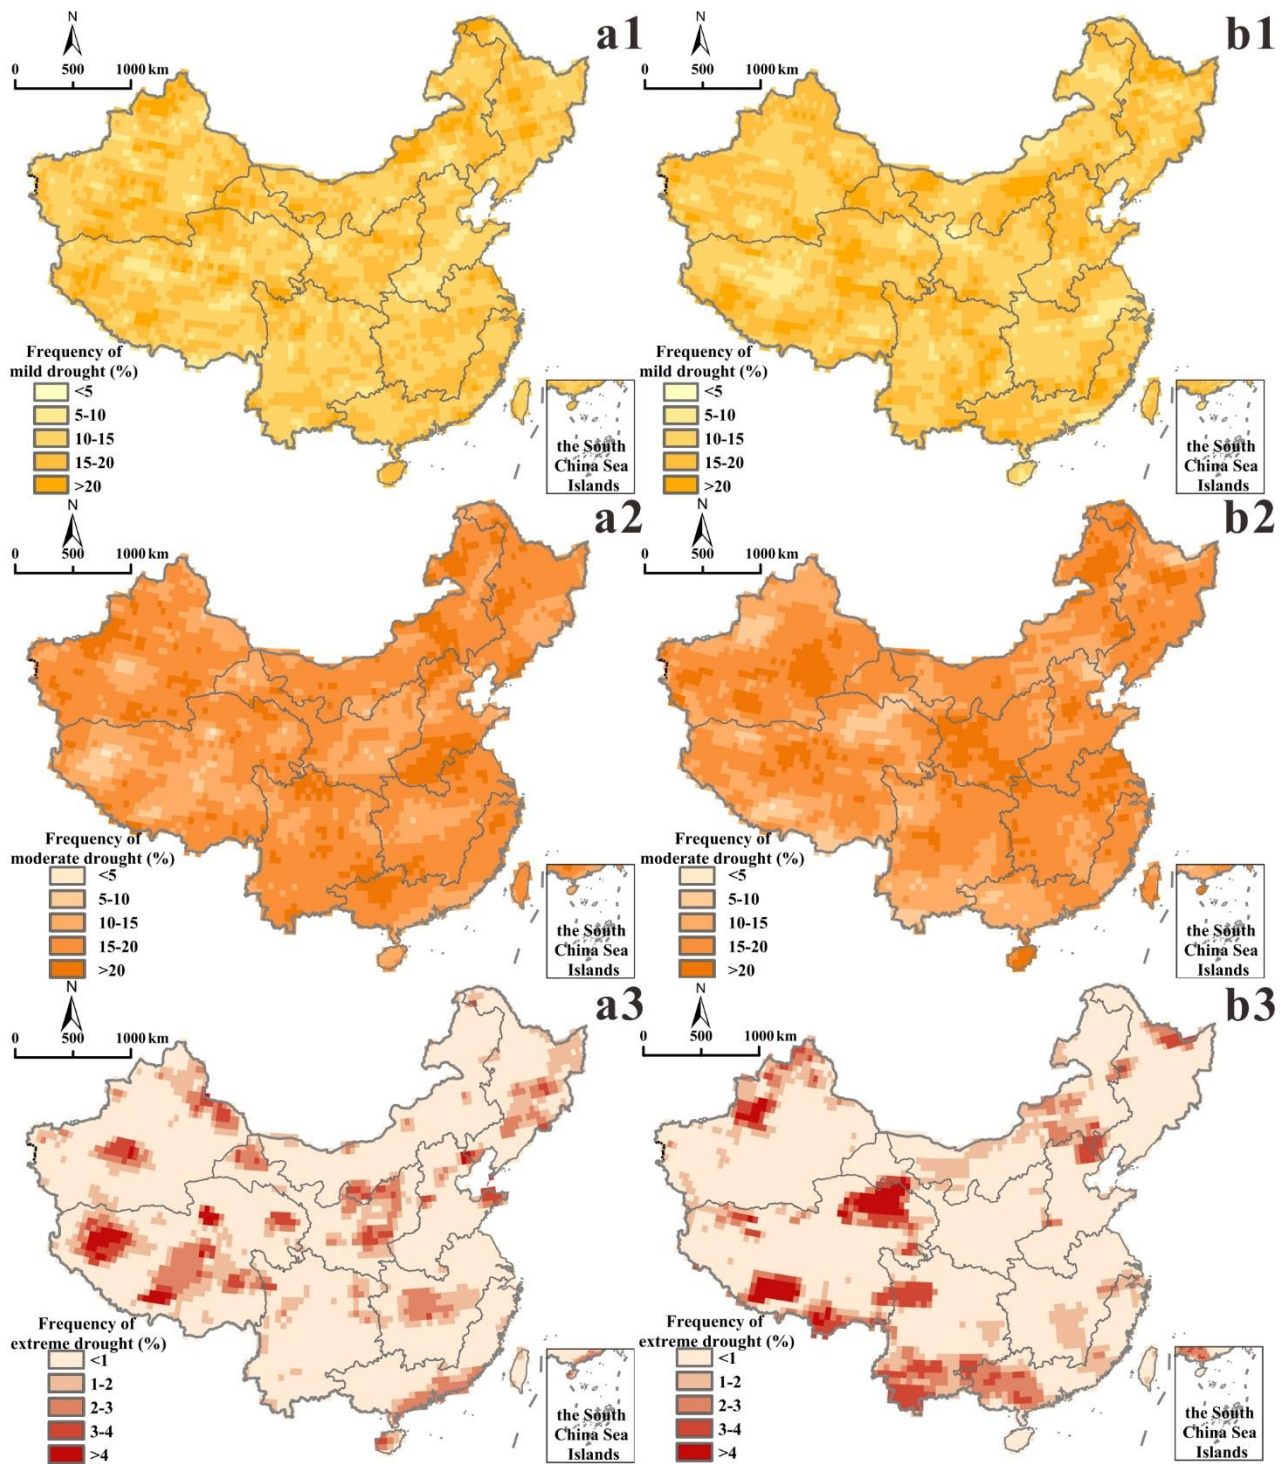

Fig. S2 Spatial distribution of drought frequency for (a) the reference period (1986-2005) and (b) 1.5°C global warming scenario (2020-2039 in RCP2.6). 1-3, mild droughts (1), moderate droughts (2), extreme droughts (3).

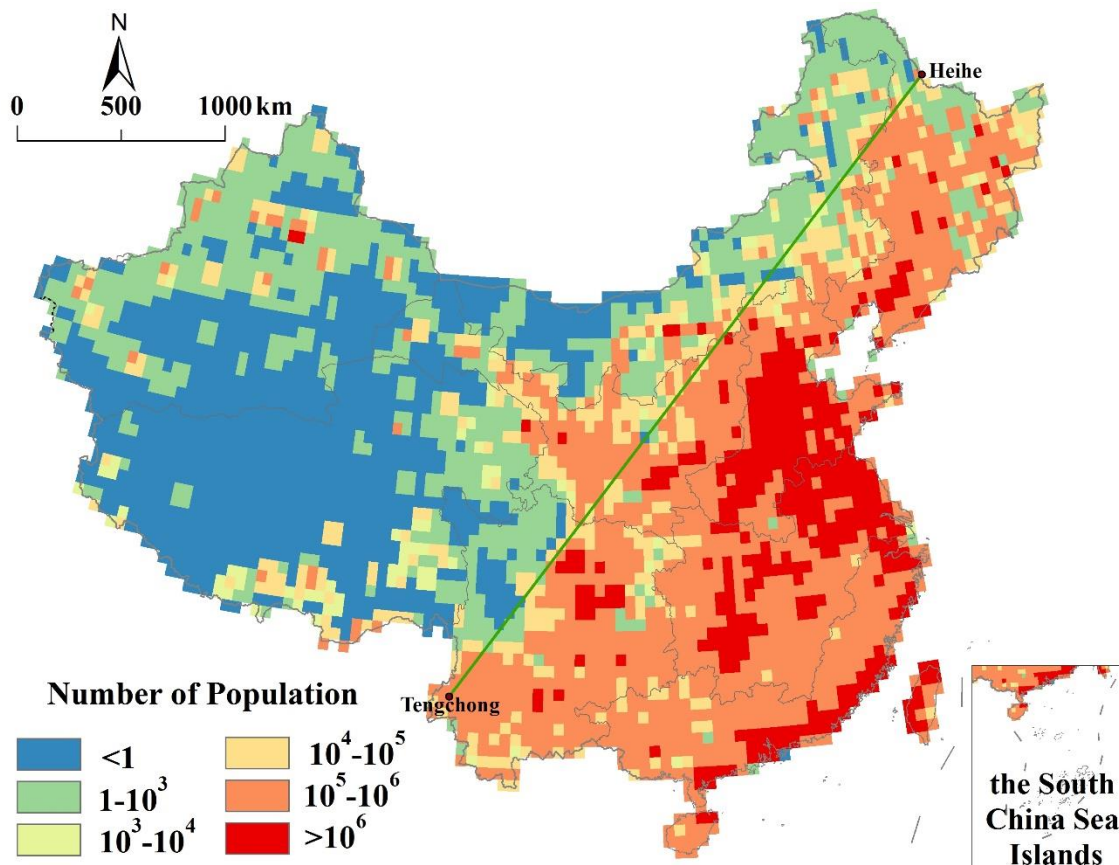

Fig. S3 Spatial distribution of population and geo-demographic demarcation line (Hu line) of China in reference period (1986-2005).

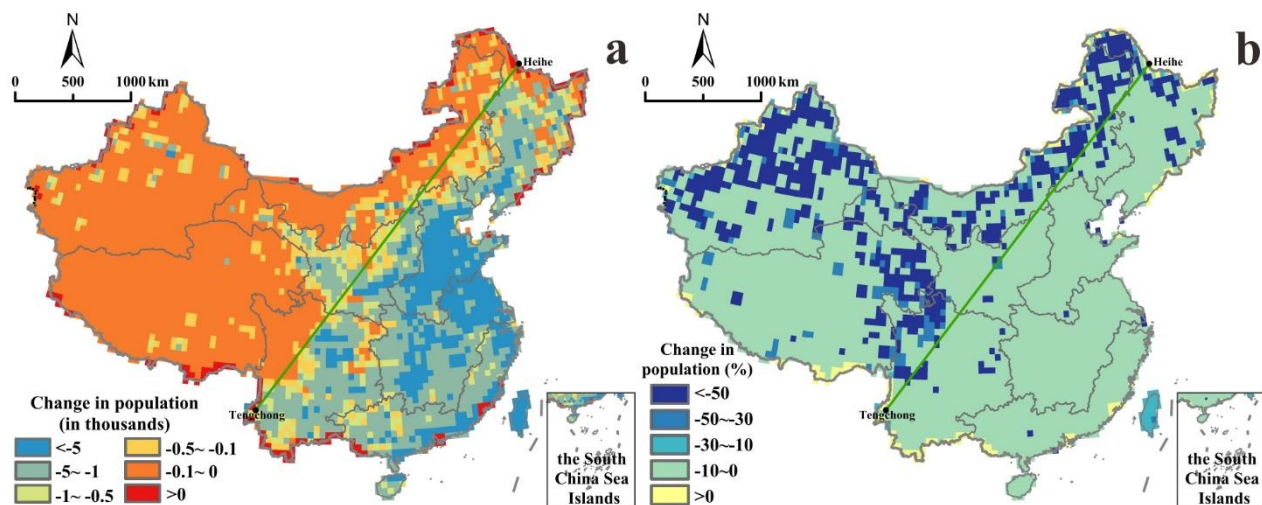

5 Fig. S4 Change in population, in number (a) and percentage (b), between the reference period (1986-2005) and 1.5°C global warming scenario (2020-2039 in RCP2.6).
